# Supplementary material for: Neuroprotective Effects of α-Lipoic acid on Ischemia/reperfusion Injury in Global Cerebral Ischemia Mouse Model
Source: Research Square preprint supplement (doi:10.21203/rs.3.rs-6662999/v1), 2025-06-09
Supplement: Supplementary file 1 [file 233a3e9061451ae9741bcb4d.docx]

**Neuroprotective Effects of α-Lipoic acid on Ischemia/reperfusion Injury in Global Cerebral Ischemia Mouse Model**

Ji Sun Lim1,4‡, Shin Kim2‡, Soyoung Kwak1, Mi-Hee Yu1, Mee-Na Park2, Hye Suk Baek2, Dong Kyu Choi3, Jeong-Ho Hong4*, Hae Won Kim1*

1Department of Nuclear Medicine, Keimyung University Dongsan Hospital, Daegu 42601, Republic of Korea

2Department of Immunology, School of Medicine, Keimyung University, Daegu 42601, Republic of Korea

3School of Life Science & Biotechnology, BK21 FOUR KNU Creative BioResearch Group, College of Natural Science, Kyungpook National University, Daegu 41566, Republic of Korea

4Department of Neurology, Keimyung University Dongsan Hospital, Daegu 42601, Republic of Korea

‡These authors contributed equally to this work

*Corresponding author:

Hae Won Kim, MD, PhD

Department of Nuclear Medicine, Keimyung University Dongsan Hospital 1035 Dalgubeol-daero, Dalseo-gu, Daegu 42601, Republic of Korea

Tel.: 82-53-250-7068, Fax: 82-53-250-8695, E-mail: hwkim.nm@gmail.com

Jeong-Ho Hong, MD, PhD

Department of Nuclear Medicine, Keimyung University Dongsan Hospital 1035 Dalgubeol-daero, Dalseo-gu, Daegu 42601, Republic of Korea

Tel: +53-258-7839, Fax: +82-258-4380, E-mail: [neurohong79@gmail.com](mailto:neurohong79@gmail.com)

**Supplementary information
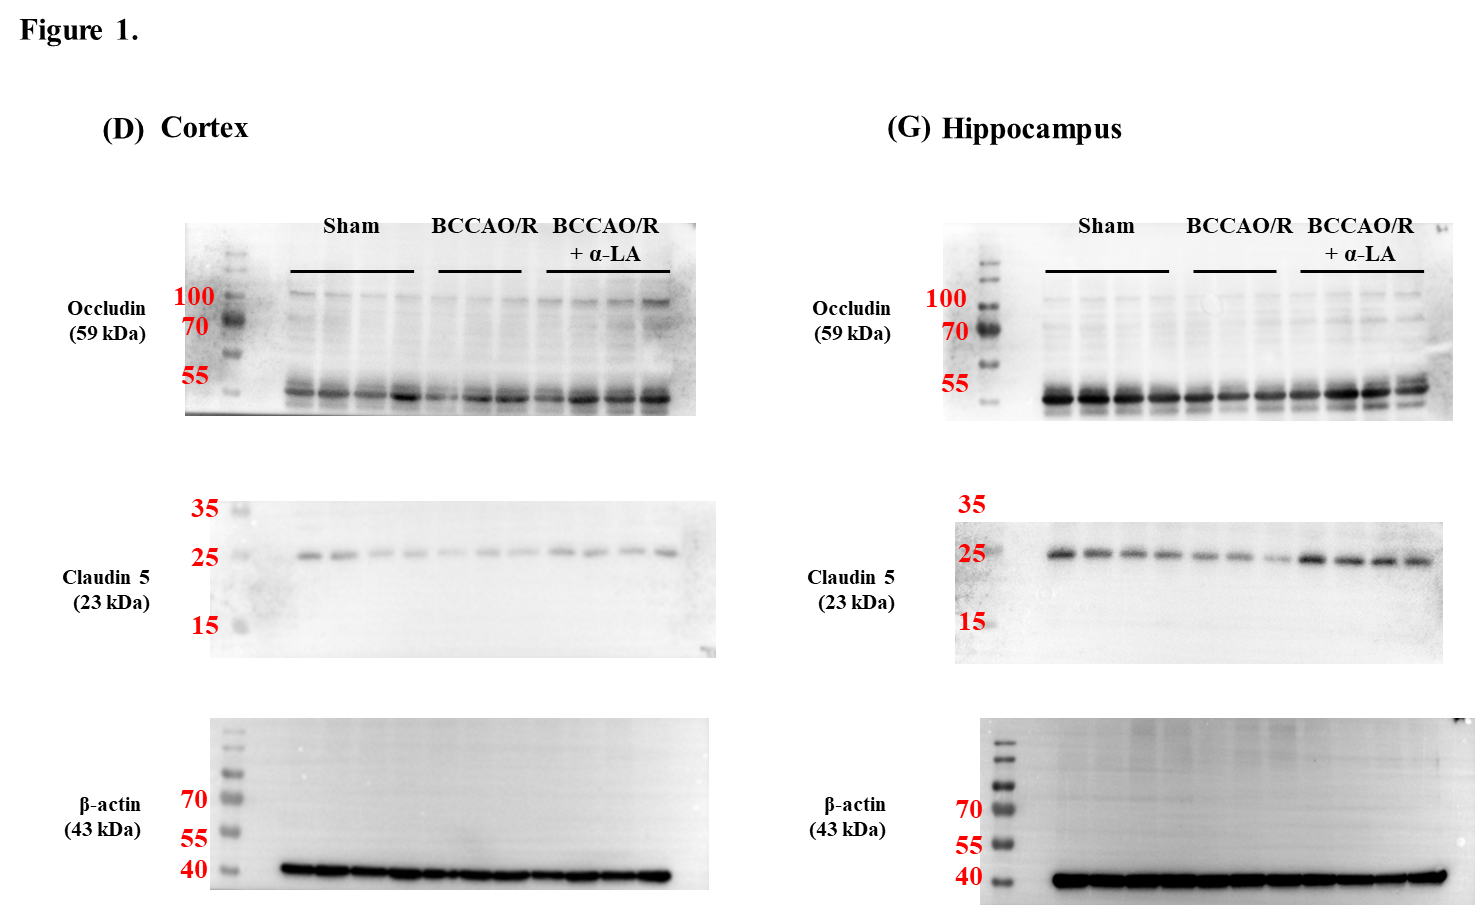
**

**
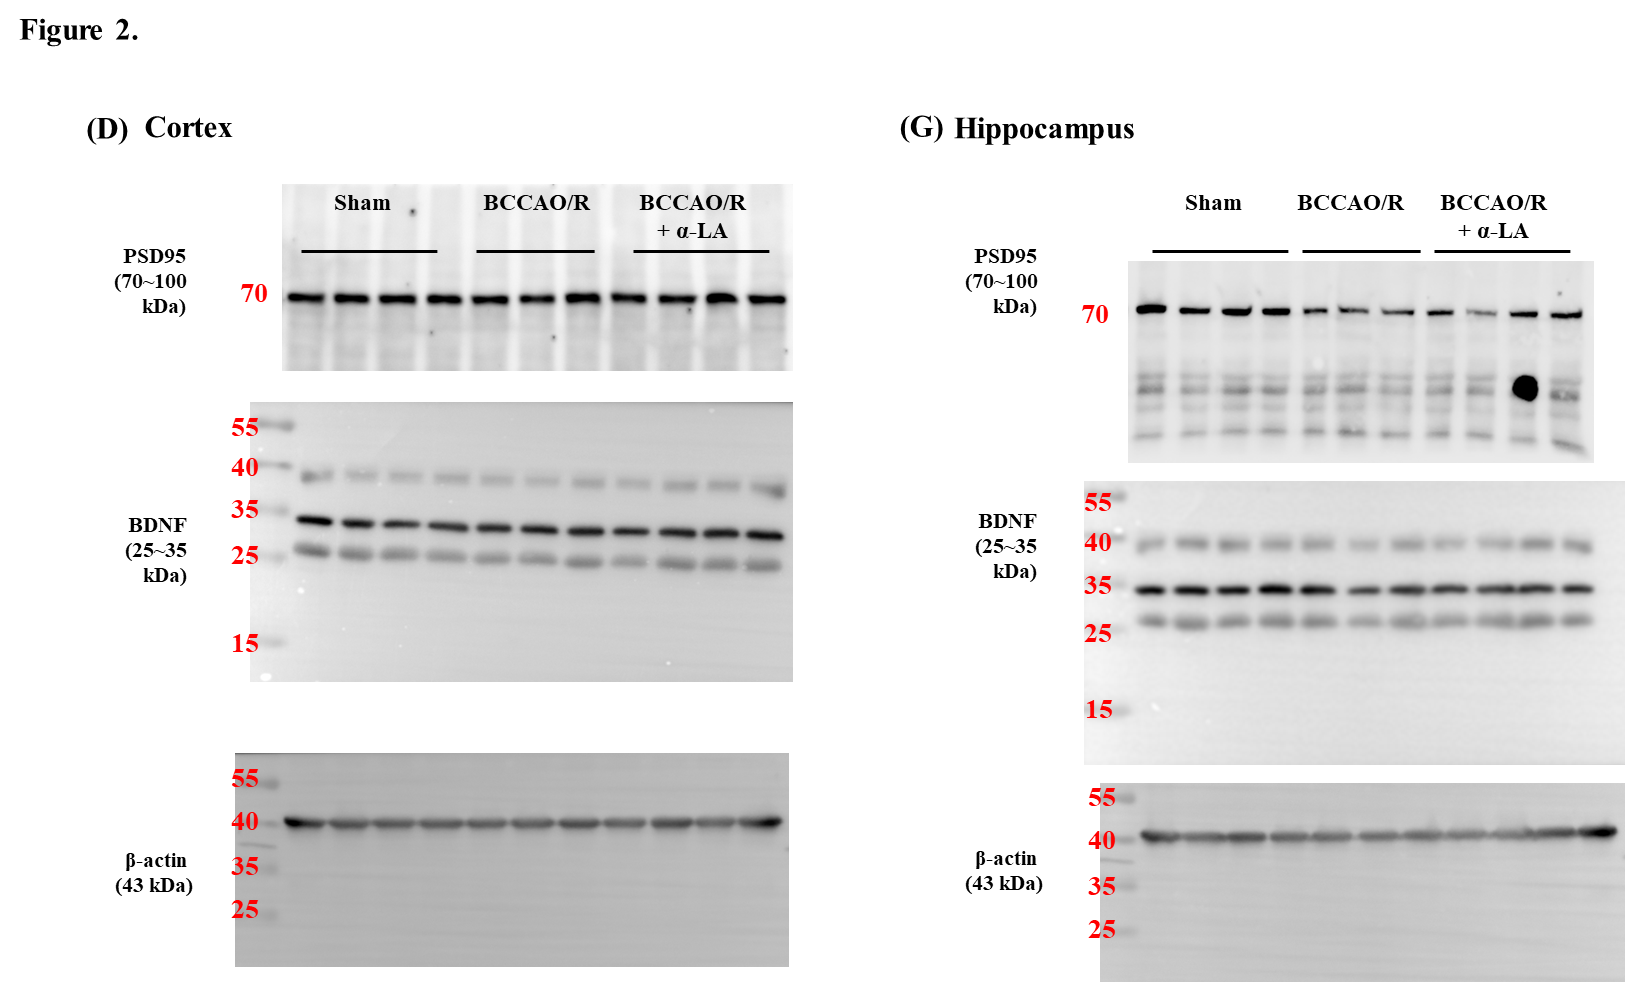
**

**
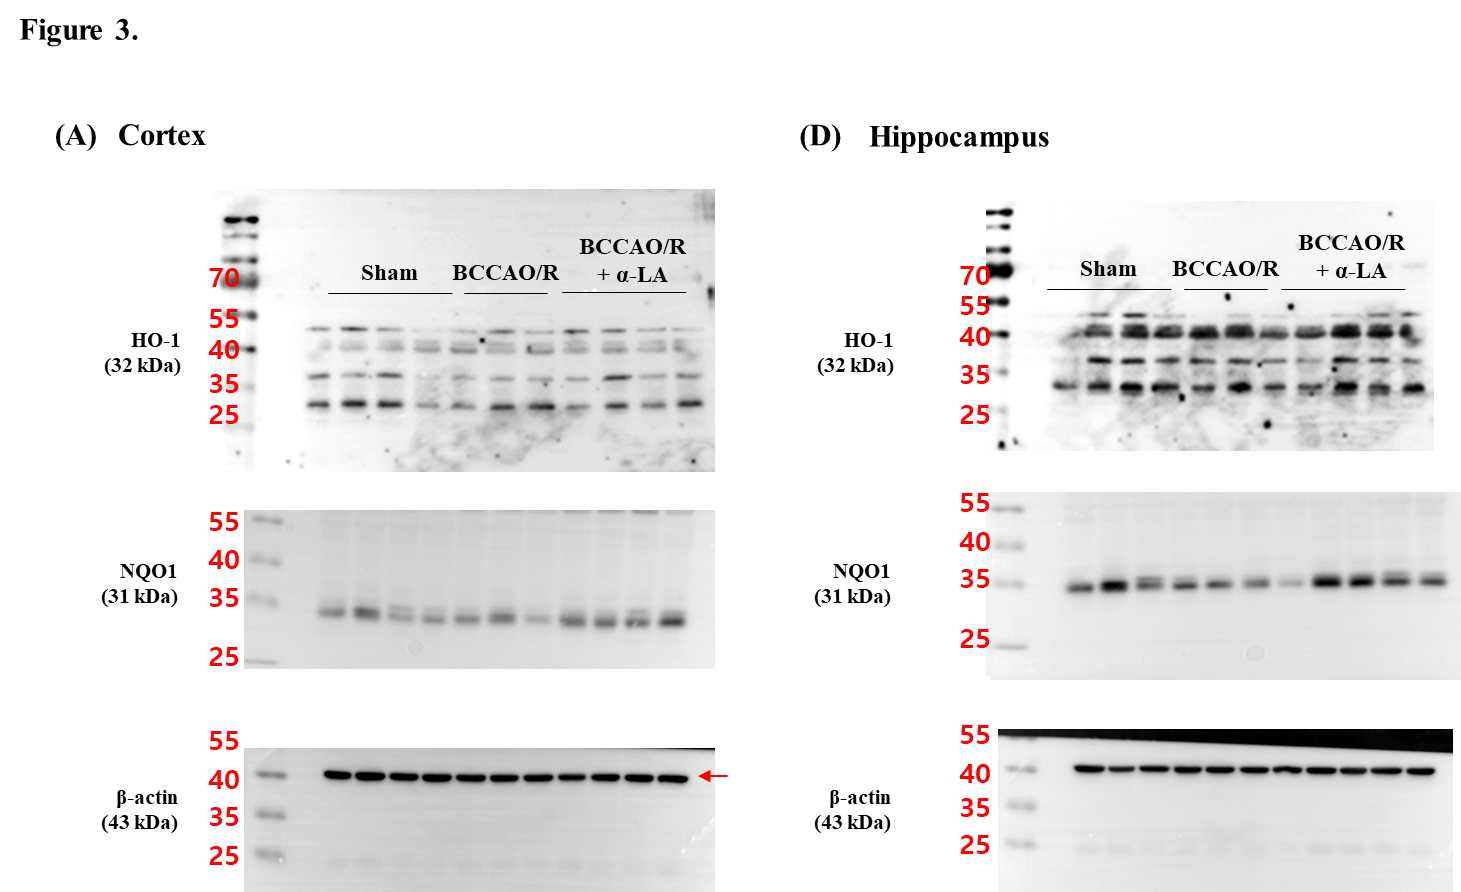
**

**
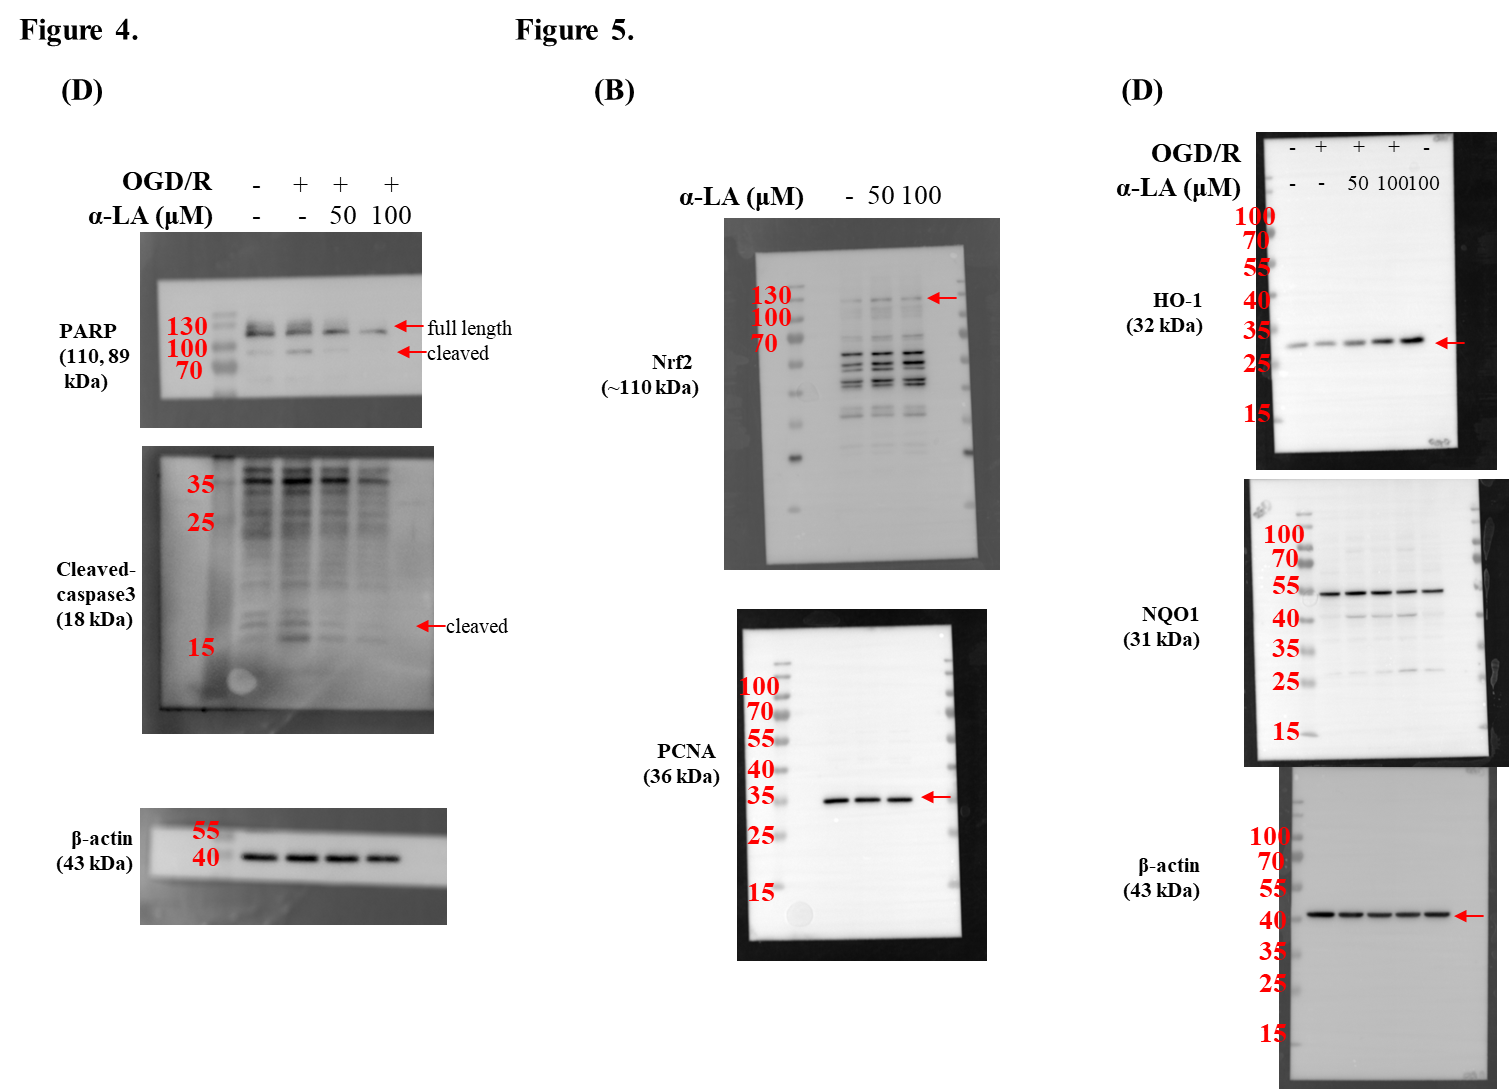
**
